# Supplementary material for: A population-based observational study of patients with pulmonary disorders in intensive care unit
Source: PubMed Central journal article supplement — Korean J Intern Med. 2019 Nov 25;35(6):1411–23. doi: 10.3904/kjim.2018.449 (PMC7652646; doi:10.3904/kjim.2018.449), 2019-11-25
Supplement: kjim-2018-449-suppl1.pdf [file kjim-2018-449-suppl1.pdf]

**Supplementary Table 1. Disease, admission, and treatment codes used to identify the patients who were eligible for the operational definition**

|                                                 | Corresponding codes                                                                                                                                                                                                                                                                                                                                                                                                                                                                                                                                                                                                                                                                                                                                                                                                                                                                                                                                                                                                                                                                                                                                                                                                                                                                                                                                          |
|-------------------------------------------------|--------------------------------------------------------------------------------------------------------------------------------------------------------------------------------------------------------------------------------------------------------------------------------------------------------------------------------------------------------------------------------------------------------------------------------------------------------------------------------------------------------------------------------------------------------------------------------------------------------------------------------------------------------------------------------------------------------------------------------------------------------------------------------------------------------------------------------------------------------------------------------------------------------------------------------------------------------------------------------------------------------------------------------------------------------------------------------------------------------------------------------------------------------------------------------------------------------------------------------------------------------------------------------------------------------------------------------------------------------------|
| KCD-7 codes for diagnosis of pulmonary disorder | <p>A15: Respiratory tuberculosis, bacteriologically and histologically confirmed</p> <p>A16: Respiratory tuberculosis, not confirmed bacteriologically or histologically</p> <p>C39: Malignant neoplasm of other and ill-defined sites in the respiratory system and intrathoracic organ</p> <p>C78.0-78.3: Secondary malignant neoplasm of respiratory organs</p> <p>D02.1-02.4: Carcinoma in situ of respiratory system</p> <p>D14.2-14.4: Benign neoplasm of respiratory system</p> <p>D38.1-38.3: Neoplasm of uncertain or unknown behavior of respiratory and intrathoracic organs</p> <p>J00-J99: Diseases of the respiratory system</p> <p>R06: Abnormalities of breathing</p> <p>R09: Other symptoms and signs involving the circulatory and respiratory systems</p> <p>R84: Abnormal findings in specimens from respiratory organs and thorax</p> <p>T48: Poisoning by agents primarily acting on smooth and skeletal muscles and the respiratory system</p> <p>U04: Severe acute respiratory syndrome (SARS)</p> <p>U19: Middle east respiratory syndrome (MERS)</p> <p>W77: Threat to breathing due to cave-in, falling earth and other substances</p> <p>W83: Other specified threats to breathing</p> <p>W84: Unspecified threat to breathing</p> <p>Y55: Agents primarily acting on smooth and skeletal muscles and the respiratory system</p> |
| Codes to identify an event of admission to ICU  | <p>AH501, AJ001, AJ002, AJ003, AJ100, AJ110, AJ120, AJ130, AJ150, AJ200, AJ210, AJ220, AJ230, AJ240, AJ250, AJ260, AJ280, AJ290, AJ300, AJ310, AJ320, AJ330, AJ340, AJ350, AJ360, AJ380, AJ390, AJ500, AJ510, AJ520, AJ530, AJ540, AJ550, AJ560, AJ580, AJ590, M0115, M0125, M0135, M0145, V5100, V5200, V5210, V5220</p>                                                                                                                                                                                                                                                                                                                                                                                                                                                                                                                                                                                                                                                                                                                                                                                                                                                                                                                                                                                                                                    |
| Codes for intubation and ventilator assistance  | <p>M5830, M5850, M5857, M5858, M5860, M5861, M5862, M5863, M5864, M5865, M5866, M5867, M5868, M5859, M5920</p>                                                                                                                                                                                                                                                                                                                                                                                                                                                                                                                                                                                                                                                                                                                                                                                                                                                                                                                                                                                                                                                                                                                                                                                                                                               |

KCD, Korean Standard Classification of Diseases and Causes of Death 7th revision; ICU, intensive care unit.
