# Supplementary material for: A population-based observational study of patients with pulmonary disorders in intensive care unit
Source: PubMed Central journal article supplement — Korean J Intern Med. 2019 Nov 25;35(6):1411–23. doi: 10.3904/kjim.2018.449 (PMC7652646; doi:10.3904/kjim.2018.449), 2019-11-25
Supplement: kjim-2018-449-suppl2.pdf [file kjim-2018-449-suppl2.pdf]

**Supplementary Table 2. Raw data of annual mean concentrations of ozone and PM<sub>10</sub>**

|                                   | Year           |         |         |                |         |         |         |         |         |         |         |         |         |         |         |
|-----------------------------------|----------------|---------|---------|----------------|---------|---------|---------|---------|---------|---------|---------|---------|---------|---------|---------|
|                                   | 2001           | 2002    | 2003    | 2004           | 2005    | 2006    | 2007    | 2008    | 2009    | 2010    | 2011    | 2012    | 2013    | 2014    | 2015    |
| <b>Ozone (O<sub>3</sub>), ppm</b> |                |         |         |                |         |         |         |         |         |         |         |         |         |         |         |
| Nationwide                        | 0.020          | 0.019   | 0.020   | 0.020          | 0.021   | 0.021   | 0.022   | 0.023   | 0.024   | 0.023   | 0.024   | 0.025   | 0.026   | 0.027   | 0.027   |
| Metropolitan area                 | 0.017          | 0.016   | 0.016   | 0.017          | 0.019   | 0.019   | 0.019   | 0.020   | 0.022   | 0.020   | 0.021   | 0.023   | 0.023   | 0.025   | 0.024   |
| Seoul                             | 0.015          | 0.014   | 0.014   | 0.014          | 0.017   | 0.018   | 0.018   | 0.019   | 0.021   | 0.019   | 0.019   | 0.021   | 0.022   | 0.023   | 0.022   |
| Busan                             | 0.025          | 0.024   | 0.023   | 0.024          | 0.023   | 0.024   | 0.024   | 0.026   | 0.027   | 0.026   | 0.027   | 0.029   | 0.029   | 0.029   | 0.029   |
| Daegu                             | 0.019          | 0.018   | 0.020   | 0.022          | 0.022   | 0.020   | 0.021   | 0.023   | 0.023   | 0.022   | 0.025   | 0.026   | 0.025   | 0.026   | 0.026   |
| Incheon                           | 0.019          | 0.019   | 0.019   | 0.020          | 0.022   | 0.020   | 0.022   | 0.024   | 0.024   | 0.021   | 0.022   | 0.024   | 0.025   | 0.026   | 0.025   |
| Gwangju                           | 0.019          | 0.016   | 0.018   | 0.022          | 0.022   | 0.021   | 0.022   | 0.023   | 0.026   | 0.024   | 0.026   | 0.027   | 0.029   | 0.029   | 0.028   |
| Daejeon                           | 0.021          | 0.019   | 0.018   | 0.019          | 0.021   | 0.018   | 0.017   | 0.023   | 0.023   | 0.021   | 0.022   | 0.024   | 0.024   | 0.026   | 0.025   |
| Ulsan                             | 0.020          | 0.021   | 0.021   | 0.022          | 0.022   | 0.021   | 0.021   | 0.023   | 0.024   | 0.023   | 0.025   | 0.026   | 0.028   | 0.028   | 0.028   |
| Gyeonggi                          | 0.018          | 0.017   | 0.017   | 0.018          | 0.019   | 0.019   | 0.019   | 0.020   | 0.022   | 0.020   | 0.021   | 0.023   | 0.023   | 0.025   | 0.025   |
| Gangwon                           | 0.023          | 0.022   | 0.021   | 0.022          | 0.024   | 0.025   | 0.025   | 0.025   | 0.027   | 0.025   | 0.026   | 0.026   | 0.026   | 0.028   | 0.028   |
| Chungbuk                          | 0.020          | 0.021   | 0.021   | 0.021          | 0.021   | 0.022   | 0.023   | 0.021   | 0.024   | 0.022   | 0.024   | 0.025   | 0.026   | 0.026   | 0.025   |
| Chungnam                          | 0.026          | 0.026   | 0.024   | 0.025          | 0.024   | 0.021   | 0.021   | 0.025   | 0.027   | 0.025   | 0.024   | 0.027   | 0.028   | 0.029   | 0.028   |
| Jeonbuk                           | 0.020          | 0.019   | 0.018   | 0.018          | 0.019   | 0.022   | 0.020   | 0.023   | 0.025   | 0.023   | 0.024   | 0.026   | 0.028   | 0.030   | 0.030   |
| Jeonnam                           | 0.026          | 0.026   | 0.031   | 0.031          | 0.027   | 0.025   | 0.030   | 0.029   | 0.031   | 0.027   | 0.028   | 0.029   | 0.032   | 0.031   | 0.030   |
| Gyeongbuk                         | 0.022          | 0.023   | 0.024   | 0.024          | 0.025   | 0.024   | 0.024   | 0.025   | 0.026   | 0.024   | 0.027   | 0.027   | 0.028   | 0.029   | 0.030   |
| Gyeongnam                         | 0.026          | 0.024   | 0.026   | 0.026          | 0.022   | 0.026   | 0.026   | 0.027   | 0.028   | 0.025   | 0.026   | 0.030   | 0.030   | 0.030   | 0.030   |
| <b>PM<sub>10</sub>, ppm</b>       |                |         |         |                |         |         |         |         |         |         |         |         |         |         |         |
| Nationwide                        | 58 (56)        | 61 (57) | 58 (58) | 59 (58)        | 57 (56) | 59 (55) | 58 (55) | 54 (52) | 53 (51) | 51 (49) | 50 (47) | 45 (45) | 49 (48) | 49 (47) | 48 (45) |
| Metropolitan area                 | 68 (62)        | 72 (63) | 68 (67) | 64 (63)        | 63 (61) | 65 (61) | 65 (62) | 58 (56) | 59 (56) | 56 (53) | 54 (51) | 47 (47) | 51 (51) | 52 (50) | 51 (47) |
| Seoul                             | 71 (65)        | 76 (65) | 69 (69) | 61 (59)        | 58 (56) | 60 (55) | 61 (58) | 55 (53) | 54 (51) | 49 (47) | 47 (44) | 41 (41) | 45 (44) | 46 (44) | 45 (41) |
| Busan                             | 60 (56)        | 69 (63) | 55 (55) | 60 (60)        | 58 (58) | 59 (55) | 57 (54) | 51 (50) | 49 (48) | 49 (47) | 47 (45) | 43 (43) | 49 (49) | 48 (47) | 46 (45) |
| Daegu                             | 67 (62)        | 71 (65) | 59 (59) | - <sup>a</sup> | 55 (54) | 54 (50) | 53 (49) | 57 (54) | 48 (46) | 51 (48) | 47 (44) | 42 (42) | 45 (45) | 45 (44) | 46 (45) |
| Incheon                           | 52 (48)        | 57 (52) | 61 (60) | 62 (61)        | 61 (59) | 68 (63) | 64 (61) | 57 (56) | 60 (57) | 55 (53) | 55 (51) | 47 (47) | 49 (49) | 49 (47) | 53 (48) |
| Gwangju                           | 57 (53)        | 52 (46) | 36 (36) | 46 (46)        | 49 (47) | 55 (52) | 52 (49) | 50 (47) | 46 (44) | 45 (42) | 43 (40) | 38 (38) | 42 (42) | 41 (39) | 43 (40) |
| Daejeon                           | 48 (44)        | 53 (45) | 43 (43) | 49 (48)        | 48 (47) | 49 (46) | 49 (46) | 45 (43) | 43 (42) | 44 (41) | 44 (41) | 39 (39) | 42 (42) | 41 (40) | 46 (44) |
| Ulsan                             | - <sup>a</sup> | 54 (47) | 40 (39) | 50 (50)        | 50 (49) | 52 (48) | 53 (49) | 54 (52) | 49 (48) | 48 (46) | 49 (47) | 46 (45) | 47 (47) | 46 (45) | 46 (45) |
| Gyeonggi                          | 71 (66)        | 74 (65) | 68 (68) | 67 (66)        | 65 (63) | 68 (63) | 66 (63) | 60 (58) | 60 (58) | 58 (56) | 56 (53) | 49 (49) | 54 (54) | 54 (53) | 53 (49) |
| Gangwon                           | 49 (46)        | 58 (51) | 57 (57) | 59 (58)        | 62 (60) | 58 (53) | 55 (50) | 56 (55) | 53 (50) | 51 (48) | 50 (47) | 47 (46) | 50 (50) | 51 (49) | 50 (47) |
| Chungbuk                          | 63 (56)        | 54 (45) | 57 (56) | 57 (56)        | 52 (51) | 57 (53) | 62 (59) | 61 (59) | 61 (59) | 62 (59) | 56 (53) | 51 (51) | 56 (55) | 52 (50) | 51 (48) |
| Chungnam                          | 54 (47)        | 54 (46) | 47 (47) | 54 (52)        | 52 (50) | 51 (47) | 54 (51) | 49 (49) | 47 (45) | 46 (44) | 44 (41) | 41 (41) | 42 (42) | 42 (41) | 46 (43) |
| Jeonbuk                           | 64 (57)        | 55 (50) | 44 (45) | 48 (47)        | 50 (50) | 56 (53) | 59 (56) | 50 (49) | 53 (51) | 53 (51) | 51 (48) | 49 (48) | 51 (51) | 51 (49) | 50 (47) |
| Jeonnam                           | 45 (42)        | 50 (45) | 45 (45) | 49 (48)        | 43 (42) | 42 (41) | 45 (42) | 45 (44) | 46 (44) | 42 (39) | 41 (38) | 36 (36) | 39 (38) | 38 (36) | 38 (37) |
| Gyeongbuk                         | 51 (46)        | 59 (52) | 56 (56) | 59 (58)        | 55 (54) | 57 (53) | 55 (52) | 53 (51) | 49 (47) | 47 (44) | 48 (45) | 45 (45) | 50 (50) | 49 (48) | 45 (44) |
| Gyeongnam                         | 51 (48)        | 51 (44) | 48 (46) | 57 (56)        | 54 (54) | 51 (48) | 49 (46) | 48 (46) | 46 (45) | 46 (44) | 46 (44) | 42 (42) | 47 (47) | 48 (47) | 46 (45) |
| Jeju                              | 46 (38)        | 45 (40) | 37 (37) | 43 (41)        | 45 (43) | 49 (47) | 44 (40) | 43 (42) | 42 (41) | 48 (43) | 42 (39) | 34 (33) | 40 (40) | 47 (44) | 44 (42) |

The values in parentheses are average values, except for the date of yellow dust.

PM<sub>10</sub>, particulate matter 10 μm or less in diameter; ppm, parts per million.

<sup>a</sup>- is less than effective measurement acquisition rate (75%).
