# Supplementary material for: A population-based observational study of patients with pulmonary disorders in intensive care unit
Source: PubMed Central journal article supplement — Korean J Intern Med. 2019 Nov 25;35(6):1411–23. doi: 10.3904/kjim.2018.449 (PMC7652646; doi:10.3904/kjim.2018.449), 2019-11-25
Supplement: kjim-2018-449-suppl3.pdf [file kjim-2018-449-suppl3.pdf]

**Supplementary Table 3. Subgroup analysis of the proportion of the patients, in-hospital mortality, re-admission to ICU, and total cost of ICU stay according to various entities of the pulmonary disorder group**

| Variable                                     | No. of patients | In-hospital mortality | Re-admission to ICU | ICU cost, 1,000 KRW, median |
|----------------------------------------------|-----------------|-----------------------|---------------------|-----------------------------|
| Pneumonia                                    | 1,842 (47.5)    | 629 (34.1)            | 432 (23.5)          | 6,299                       |
| Acute exacerbation of chronic airway disease | 559 (14.4)      | 128 (22.9)            | 143 (25.6)          | 4,676                       |
| Pneumonitis                                  | 453 (11.7)      | 134 (29.6)            | 125 (27.6)          | 7,294                       |
| Respiratory failure                          | 323 (8.3)       | 147 (45.5)            | 61 (18.9)           | 6,491                       |
| ARDS                                         | 126 (3.3)       | 69 (54.8)             | 26 (20.6)           | 9,877                       |
| Pulmonary embolism                           | 119 (3.1)       | 18 (15.1)             | 14 (11.8)           | 4,714                       |
| Interstitial lung disease                    | 92 (2.4)        | 52 (56.5)             | 8 (8.7)             | 7,478                       |
| Pulmonary edema                              | 56 (1.4)        | 13 (23.2)             | 12 (21.4)           | 3,726                       |
| Pleural effusion                             | 50 (1.3)        | 16 (32.0)             | 14 (28.0)           | 5,683                       |
| Empyema                                      | 47 (1.2)        | 12 (25.5)             | 11 (23.4)           | 10,542                      |
| Lung abscess                                 | 44 (1.1)        | 9 (20.5)              | 10 (22.7)           | 8,011                       |
| Neoplastic disorder                          | 40 (1.0)        | 19 (47.5)             | 7 (17.5)            | 10,283                      |
| Nonspecific diagnosis                        | 36 (0.9)        | 7 (19.4)              | 2 (5.6)             | 5,103                       |
| Pneumothorax                                 | 35 (0.9)        | 10 (28.6)             | 9 (25.7)            | 5,760                       |
| Other respiratory disorder                   | 53 (1.4)        | 6 (11.3)              | 10 (18.9)           | 6,324                       |

Values are presented as number (%).

ICU, intensive care unit; KRW, Korean won; ARDS, acute respiratory distress syndrome.
