# Supplementary material for: A population-based observational study of patients with pulmonary disorders in intensive care unit
Source: PubMed Central journal article supplement — Korean J Intern Med. 2019 Nov 25;35(6):1411–23. doi: 10.3904/kjim.2018.449 (PMC7652646; doi:10.3904/kjim.2018.449), 2019-11-25
Supplement: kjim-2018-449-suppl4.pdf [file kjim-2018-449-suppl4.pdf]

**Supplementary Table 4. Most probable major cause of overall death in the critically ill patients who expired**

| Variable                                  | Non-pulmonary disorder (n = 3,767) | Pulmonary disorder (n = 2,333) |
|-------------------------------------------|------------------------------------|--------------------------------|
| Cardiovascular disorder                   | 1,357 (36.0)                       | 455 (19.5)                     |
| Malignancy                                | 923 (24.5)                         | 186 (8.0)                      |
| Trauma and poisoning                      | 275 (7.3)                          | 61 (2.6)                       |
| Gastrointestinal disorder                 | 253 (6.7)                          | 73 (3.1)                       |
| Endocrine disorder                        | 235 (6.2)                          | 134 (5.7)                      |
| Pulmonary disorder                        | 231 (6.1)                          | 1,047 (44.9)                   |
| Renal disorder                            | 104 (2.8)                          | 56 (2.4)                       |
| Infection                                 | 85 (2.3)                           | 55 (2.4)                       |
| Neurologic disorder                       | 68 (1.8)                           | 99 (4.2)                       |
| Vasculitis and connective tissue disorder | 24 (0.6)                           | 24 (1.0)                       |
| Hematologic disorder                      | 9 (0.2)                            | 6 (0.3)                        |
| Nonspecific diagnosis                     | 124 (3.3)                          | 58 (2.5)                       |

Values are presented as number (%).
