# Supplementary material for: A population-based observational study of patients with pulmonary disorders in intensive care unit
Source: PubMed Central journal article supplement — Korean J Intern Med. 2019 Nov 25;35(6):1411–23. doi: 10.3904/kjim.2018.449 (PMC7652646; doi:10.3904/kjim.2018.449), 2019-11-25
Supplement: kjim-2018-449-suppl5.pdf [file kjim-2018-449-suppl5.pdf]

**Supplementary Table 5. Baseline characteristics of critically ill patients, according to in-hospital survival status**

| Characteristic                                                  | In-hospital survivors<br>(n = 9,798) | In-hospital non-survi-<br>vors (n = 3,140) | Difference (95% CI)  |
|-----------------------------------------------------------------|--------------------------------------|--------------------------------------------|----------------------|
| Age, yr                                                         | 65.4 ± 15.3                          | 71.0 ± 13.2                                | 5.6 (5.0 to 6.1)     |
| Male sex                                                        | 5,620 (57.4)                         | 1,924 (61.3)                               | 3.9 (1.8 to 5.7)     |
| Residence in rural areas                                        | 6,042 (61.7)                         | 1,940 (61.8)                               | 0.1 (-1.9 to 2.0)    |
| PM10 concentration increased compared to previous year          | 4,112 (42.1)                         | 1,157 (37.0)                               | -5.1 (-7.2 to -3.3)  |
| Ozone concentration increased compared to previous year         | 7,471 (76.3)                         | 2,475 (79.1)                               | 2.6 (0.7 to 4.0)     |
| No. of total healthcare units per area (10 km <sup>2</sup> )    | 520.8 ± 445.7                        | 526.9 ± 441.3                              | -6.1 (-24.0 to 11.8) |
| No. of tertiary healthcare units per area (10 km <sup>2</sup> ) | 2.3 ± 3.4                            | 2.2 ± 3.4                                  | 0.06 (-0.08 to 0.2)  |
| Income, decile                                                  |                                      |                                            |                      |
| 1st                                                             | 808 (8.2)                            | 236 (7.5)                                  | -0.7 (-1.8 to 0.3)   |
| 2nd                                                             | 581 (5.9)                            | 152 (4.8)                                  | -1.1 (-2.0 to -0.2)  |
| 3rd                                                             | 551 (5.6)                            | 170 (5.4)                                  | -0.2 (-1.2 to 0.7)   |
| 4th                                                             | 686 (7.0)                            | 184 (5.9)                                  | -1.1 (-2.1 to -0.2)  |
| 5th                                                             | 668 (6.8)                            | 184 (5.9)                                  | -1.0 (-2.0 to 0.004) |
| 6th                                                             | 715 (7.3)                            | 197 (6.3)                                  | -1.0 (-2.1 to -0.03) |
| 7th                                                             | 897 (9.2)                            | 248 (7.9)                                  | -1.3 (-2.4 to -0.2)  |
| 8th                                                             | 937 (9.6)                            | 335 (10.7)                                 | 1.1 (-0.2 to 2.3)    |
| 9th                                                             | 1,205 (12.3)                         | 407 (13.0)                                 | 0.6 (-0.7 to 2.0)    |
| 10th                                                            | 1,254 (12.8)                         | 493 (15.7)                                 | 2.9 (1.4 to 4.3)     |
| Not recorded                                                    | 1,496 (15.3)                         | 534 (17.0)                                 |                      |
| Charlson comorbidity index                                      |                                      |                                            |                      |
| 0-1                                                             | 775 (7.9)                            | 102 (3.2)                                  | -4.7 (-5.5 to -3.8)  |
| 2-4                                                             | 4,287 (43.8)                         | 1,532 (48.8)                               | 5.0 (2.9 to 6.9)     |
| > 4                                                             | 4,736 (48.3)                         | 1,506 (48.0)                               | -0.4 (-2.6 to 1.5)   |
| Severity of disability                                          |                                      |                                            |                      |
| Severe (grade 1 and 2)                                          | 982 (9.6)                            | 365 (12.3)                                 | 1.6 (0.3 to 2.9)     |
| Mild (grade 3, 4, 5, and 6)                                     | 1,396 (14.6)                         | 501 (15.1)                                 | 1.7 (0.2 to 3.1)     |
| No disability                                                   | 7,420 (75.8)                         | 2,274 (72.6)                               | -3.3 (-5.3 to -1.7)  |

Values are presented as mean ± SD or number (%).

CI, confidence interval; PM10, particulate matter 10 µm or less in diameter.
