# Supplementary material for: A population-based observational study of patients with pulmonary disorders in intensive care unit
Source: PubMed Central journal article supplement — Korean J Intern Med. 2019 Nov 25;35(6):1411–23. doi: 10.3904/kjim.2018.449 (PMC7652646; doi:10.3904/kjim.2018.449), 2019-11-25
Supplement: kjim-2018-449-suppl6.pdf [file kjim-2018-449-suppl6.pdf]

**Supplementary Table 6. Utilization of healthcare resources in critically ill patients, according to in-hospital survival status**

| Variable                                           | In-hospital survivors<br>(n = 9,798) | In-hospital<br>non-survivors (n = 3,140) | Difference<br>(95% CI) |
|----------------------------------------------------|--------------------------------------|------------------------------------------|------------------------|
| Cause of admission to ICU                          |                                      |                                          |                        |
| Pulmonary disorder                                 | 2,604 (26.6)                         | 1,269 (40.4)                             | 13.8 (11.8 to 15.7)    |
| Course of admission to hospital                    |                                      |                                          |                        |
| Through outpatient clinic                          | 3,211 (32.8)                         | 1,139 (36.3)                             | 3.5 (1.5 to 5.3)       |
| Through emergency room                             | 6,512 (66.5)                         | 1,922 (61.2)                             | -5.3 (-7.4 to -3.5)    |
| All others                                         | 75 (0.8)                             | 79 (2.5)                                 | 1.8 (1.2 to 2.3)       |
| ICU volume per healthcare unit                     |                                      |                                          |                        |
| High                                               | 9,561 (97.6)                         | 3,009 (95.8)                             | -1.8 (-2.8 to -1.3)    |
| Middle                                             | 209 (2.1)                            | 115 (3.6)                                | 1.5 (0.8 to 2.3)       |
| Low                                                | 28 (0.3)                             | 16 (0.5)                                 | 0.2 (-0.1 to 0.5)      |
| No. of days spent in the hospital                  | 24.3 ± 24.9                          | 19.1 ± 25.7                              | -5.2 (-6.2 to -4.1)    |
| No. of days spent in the ICU                       | 10.0 ± 16.4                          | 10.1 ± 19.0                              | 0.2 (-0.6 to 0.9)      |
| Use of endotracheal tube and mechanical ventilator | 2,081 (21.2)                         | 1,899 (60.5)                             | 39.2 (37.3 to 41.1)    |
| No. of days using mechanical ventilator            | 9.1 ± 16.2                           | 8.3 ± 18.6                               | -0.8 (-1.9 to 0.3)     |
| Total cost during ICU stay, 1,000 KRW              | 7,154 ± 9,888                        | 7,700 ± 11,999                           | 547 (84 to 1,001.0)    |
| ICU cost, tertile                                  |                                      |                                          |                        |
| 1st                                                | 3,644 (37.2)                         | 1,466 (46.7)                             | 9.5 (7.4 to 11.4)      |
| 2nd                                                | 3,592 (36.7)                         | 763 (24.3)                               | -12.4 (-14.3 to -10.7) |
| 3rd                                                | 2,562 (26.1)                         | 911 (29.0)                               | 2.9 (1.0 to 4.6)       |

Values are presented as number (%) or mean ± SD.

CI, confidence interval; ICU, intensive care unit; KRW, Korean won.
