# Supplementary material for: A population-based observational study of patients with pulmonary disorders in intensive care unit
Source: PubMed Central journal article supplement — Korean J Intern Med. 2019 Nov 25;35(6):1411–23. doi: 10.3904/kjim.2018.449 (PMC7652646; doi:10.3904/kjim.2018.449), 2019-11-25
Supplement: kjim-2018-449-suppl7.pdf [file kjim-2018-449-suppl7.pdf]

**Supplementary Table 7. Results of univariable regression analysis with Cox proportional hazards model to evaluate the risk of in-hospital mortality in the pulmonary disorder and non-pulmonary disorder groups**

| Variable                                                            | Non-pulmonary disorder group |         | Pulmonary disorder group |         |
|---------------------------------------------------------------------|------------------------------|---------|--------------------------|---------|
|                                                                     | HR (95% CI)                  | p value | HR (95% CI)              | p value |
| Age                                                                 | 1.026 (1.023–1.030)          | < 0.001 | 1.023 (1.018–1.018)      | < 0.001 |
| Male sex                                                            | 1.105 (1.008–1.212)          | 0.034   | 1.127 (1.004–1.264)      | 0.042   |
| Urban area                                                          | 0.920 (0.838–1.011)          | 0.082   | 1.122 (1.003–1.256)      | 0.044   |
| PM10 concentration increase of 1 ppm compared to previous year      | 0.987 (0.976–0.999)          | 0.035   | 0.965 (0.950–0.980)      | < 0.001 |
| Ozone concentration increase of 0.001 ppm compared to previous year | 1.041 (1.012–1.072)          | 0.006   | 1.025 (0.989–1.063)      | 0.176   |
| Income, decile                                                      | 1.011 (0.998–1.025)          | 0.093   | 1.009 (0.994–1.024)      | 0.260   |
| Charlson comorbidity index > 4                                      | 2.128 (1.702–2.660)          | < 0.001 | 2.192 (1.371–3.504)      | 0.001   |
| Disability                                                          | 1.254 (1.128–1.394)          | < 0.001 | 0.968 (0.861–1.090)      | 0.593   |
| Admission through emergency room                                    | 0.782 (0.712–0.859)          | < 0.001 | 1.044 (0.928–1.174)      | 0.475   |
| High ICU patient volume                                             | 0.512 (0.414–0.633)          | < 0.001 | 0.857 (0.628–1.170)      | 0.331   |

HR, hazard ratio; CI, confidence interval; PM10, particulate matter 10 µm or less in diameter; ppm, parts per million; ICU, intensive care unit.
