# Supplementary material for: A population-based observational study of patients with pulmonary disorders in intensive care unit
Source: PubMed Central journal article supplement — Korean J Intern Med. 2019 Nov 25;35(6):1411–23. doi: 10.3904/kjim.2018.449 (PMC7652646; doi:10.3904/kjim.2018.449), 2019-11-25
Supplement: kjim-2018-449-suppl8.pdf [file kjim-2018-449-suppl8.pdf]

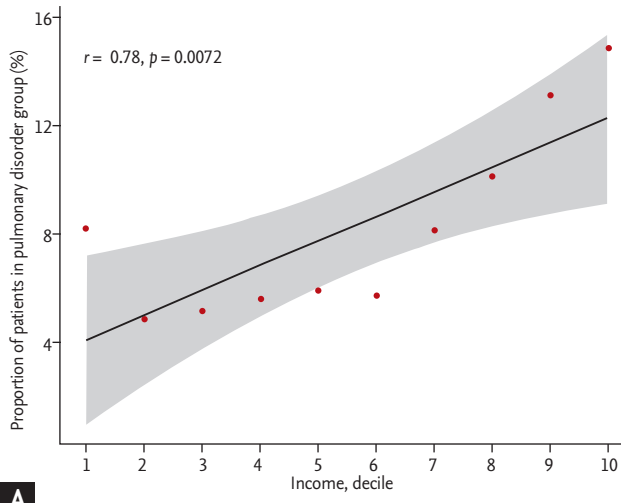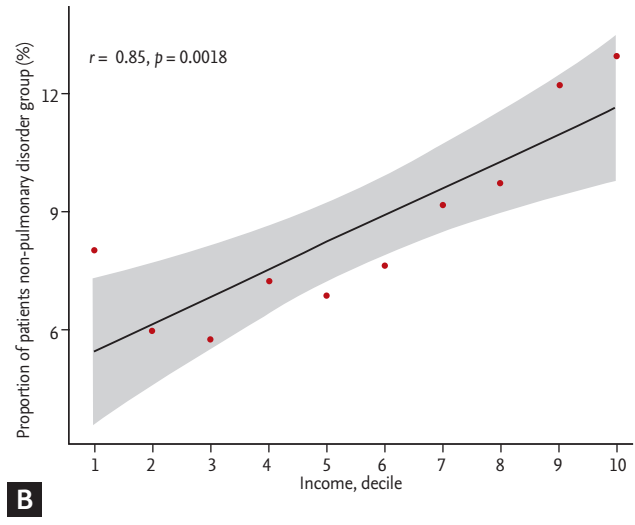

**Supplementary Figure 1.** Linear relationship between income and proportion of the (A) pulmonary disorder group and (B) non-pulmonary disorder group.
